# Supplementary material for: SARS-CoV-2 ferritin nanoparticle vaccine induces robust innate immune activity driving polyfunctional spike-specific T cell responses
Source: PubMed Central journal article supplement (PMC8668928; doi:10.1038/s41541-021-00414-4), 2021-12-13
Supplement: 41541_2021_414_MOESM1_ESM.pdf [file 41541_2021_414_MOESM1_ESM.pdf]

## Supplementary Materials

### SARS-CoV-2 ferritin nanoparticle vaccine induces robust innate immune activity driving polyfunctional spike-specific T cell responses

Joshua M. Carmen<sup>1\*</sup>, Shikha Shrivastava<sup>1,2\*</sup>, Zhongyan Lu<sup>3\*</sup>, Alexander Anderson<sup>1,2</sup>, Elaine B. Morrison<sup>1</sup>, Rajeshwer S. Sankhala<sup>4,5</sup>, Wei-Hung Chen<sup>4,5</sup>, William C. Chang<sup>4,5</sup>, Jessica S. Bolton<sup>6</sup>, Gary R. Matyas<sup>1</sup>, Nelson L. Michael<sup>7</sup>, M. Gordon Joyce<sup>4,5</sup>, Kayvon Modjarrad<sup>4</sup>, Jeffrey R. Currier<sup>8</sup>, Elke Bergmann-Leitner<sup>6</sup>, Allison M.W. Malloy<sup>3†</sup>, and Mangala Rao<sup>1‡</sup>

<sup>‡</sup>Corresponding author. Email: [mr Rao@hivresearch.org](mailto:mr Rao@hivresearch.org)

<sup>†</sup>Co-Corresponding Author: Email: [Allison.malloy@usuhs.edu](mailto:Allison.malloy@usuhs.edu)

This file includes:

#### SUPPLEMENTARY MATERIALS

**Supplementary Fig. 1.** Flow cytometry analysis of innate immune cells in draining lymph nodes responding to SpFN vaccine adjuvanted with ALFQ or AH.

**Supplementary Fig. 2.** Characterization of the responding T cells upon priming with SpFN vaccine adjuvanted with ALFQ or AH.

**Supplementary Fig. 3.** Frequency of total CD3<sup>+</sup> T cells in splenocytes of mice following prime and prime boost vaccination with SpFN adjuvanted with AH or ALFQ.

**Supplementary Fig. 4.** Flow gating strategy to determine the frequency of cytokine secreting CD4<sup>+</sup> and CD8<sup>+</sup> T cells.

**Supplementary Fig. 5.** Amino acid sequence of the SARS-COV-2 spike protein.

**Supplementary Fig. 6.** Flow gating strategy to determine the frequency of SARS-CoV-2 spike-specific CD8<sup>+</sup> T cells in the splenocytes of mice as detected by MHC class I tetramer staining following SpFN vaccination.

**Supplementary Fig. 7.** Flow gating strategy to determine the frequency of SARS-CoV-2 spike-specific CD8<sup>+</sup> T cells in perfused lungs of SpFN vaccinated mice as detected by MHC class I tetramer staining followed by CD69 and CD103 staining.

**Supplementary Table 1.** List of antibodies used for Cytex flow cytometry-based analysis of the APC phenotypes

**Supplementary Table 2.** List of antibodies used for Cytex flow cytometry-based analysis of the T cell phenotypes

**Supplementary Table 3.** List of antibodies used for Cytex flow cytometry-based analysis of the T cell cytokine staining

49 **Supplementary Table 4.** List of antibodies used for intracellular cytokine staining by BD LSRII flow  
50 cytometry-based analysis of the cytokine response in the splenocytes

51  
52 **Supplementary Table 5.** List of antibodies used for staining perfused lung cells and analysis by BD LSRII  
53 flow cytometry

54  
55 **Supplementary Table 6.** List of MHC class I tetramer used for the detection of SARS-CoV-2 spike specific  
56 CD8<sup>+</sup> T cell response

57

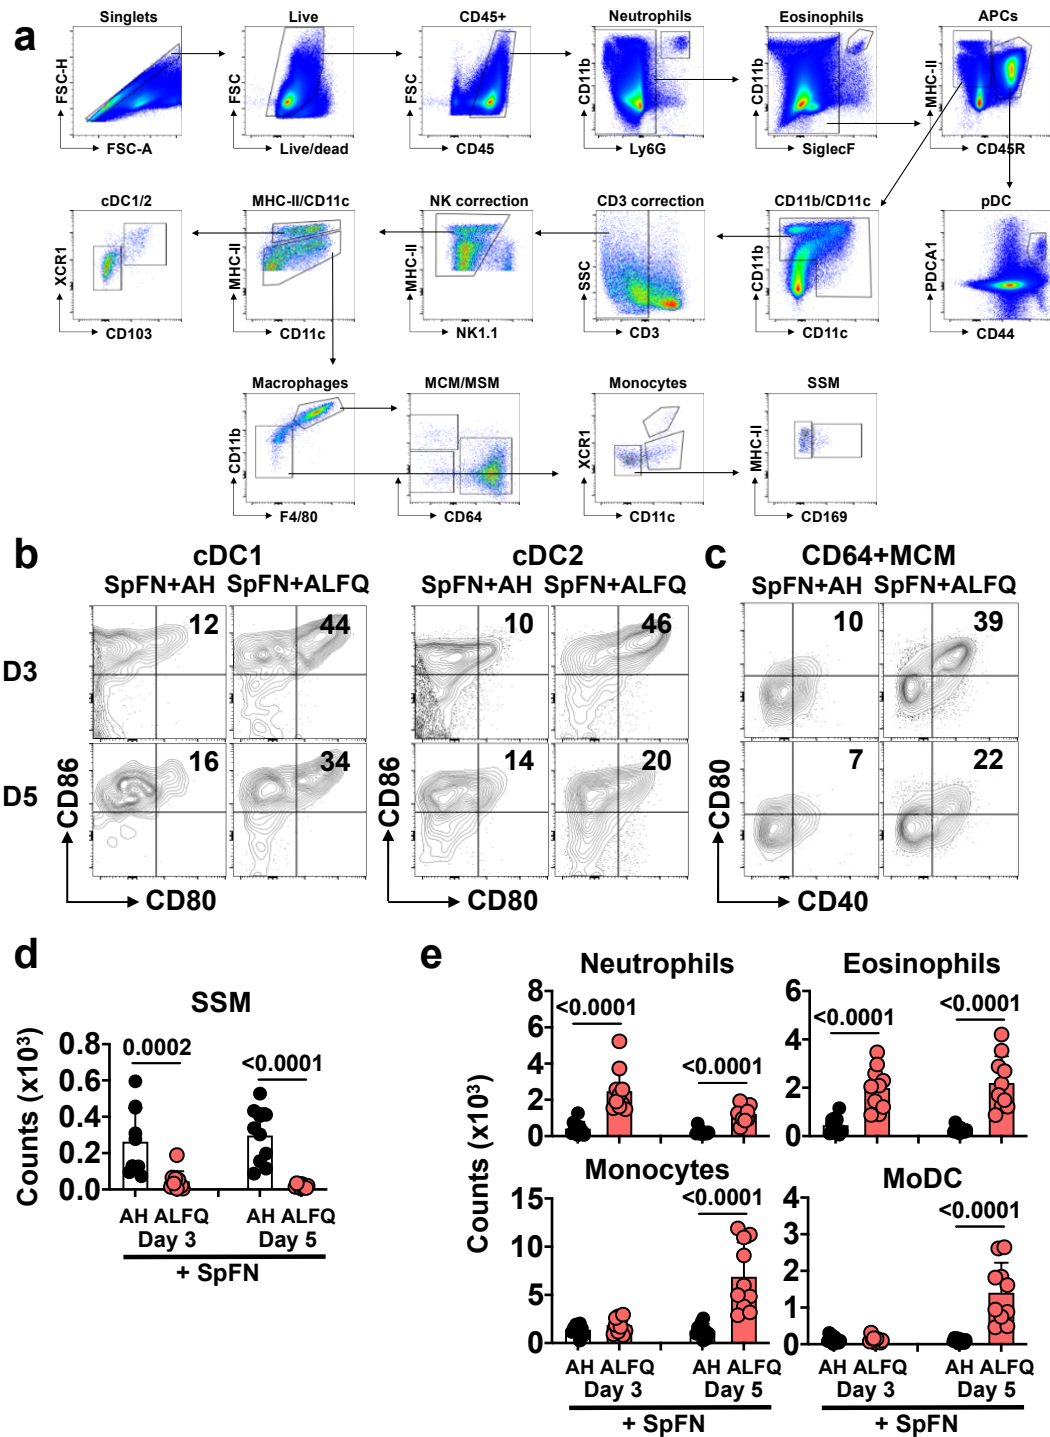

**Supplementary Fig. 1. Spectral flow cytometry analysis of innate immune cells in draining lymph nodes responding to SpFN vaccine adjuvanted with ALFQ or AH.**

(a) Flow cytometry gating strategy for the identification of neutrophils (Ly6G<sup>+</sup>CD11b<sup>+</sup>), eosinophils (Siglec F<sup>+</sup>CD11b<sup>+</sup>), pDCs (MHC-II<sup>+</sup>CD45R<sup>+</sup>PDCA1<sup>+</sup>), cDC1 (MHC-II high CD11c<sup>+</sup>XCR1<sup>+</sup>CD103<sup>+</sup>), cDC2 (MHC-II high CD11c<sup>+</sup>XCR1<sup>+</sup>), MSM (MHC-II<sup>+</sup>F4/80<sup>+</sup>CD11b<sup>+</sup>CD169<sup>+</sup>CD64<sup>-</sup>), MCM (MHC-II<sup>+</sup>F4/80<sup>+</sup>CD11b<sup>+</sup>CD169<sup>-</sup>CD64<sup>+/+</sup>), SSM (CD11b<sup>+</sup>CD169<sup>+</sup>F4/80<sup>+</sup>), XCR1+cDC1-like MoDCs (MHC-II<sup>+</sup>CD11b int CD11c<sup>+</sup>XCR1<sup>+</sup>), XCR1-CD11c<sup>+</sup>MoDCs (MHC-II<sup>+</sup>CD11b int CD11c<sup>+</sup>XCR1<sup>-</sup>), and monocytes (MHC-II<sup>+</sup>CD11b int CD11c<sup>-</sup>XCR1<sup>-</sup>). (b) Flow cytometry plots demonstrating expression of costimulatory molecules CD80 and CD86 by cDC upon activation after vaccination. (c) Flow cytometry plots demonstrating activation of MCM by expression of CD40 and CD80. (d) Magnitude of SSM, and (e) other non-classical APCs, including neutrophils, eosinophils, XCR1<sup>+</sup>MoDCs, and monocytes at days 3 and 5 post priming vaccination. Bars indicate mean  $\pm$  s.d.

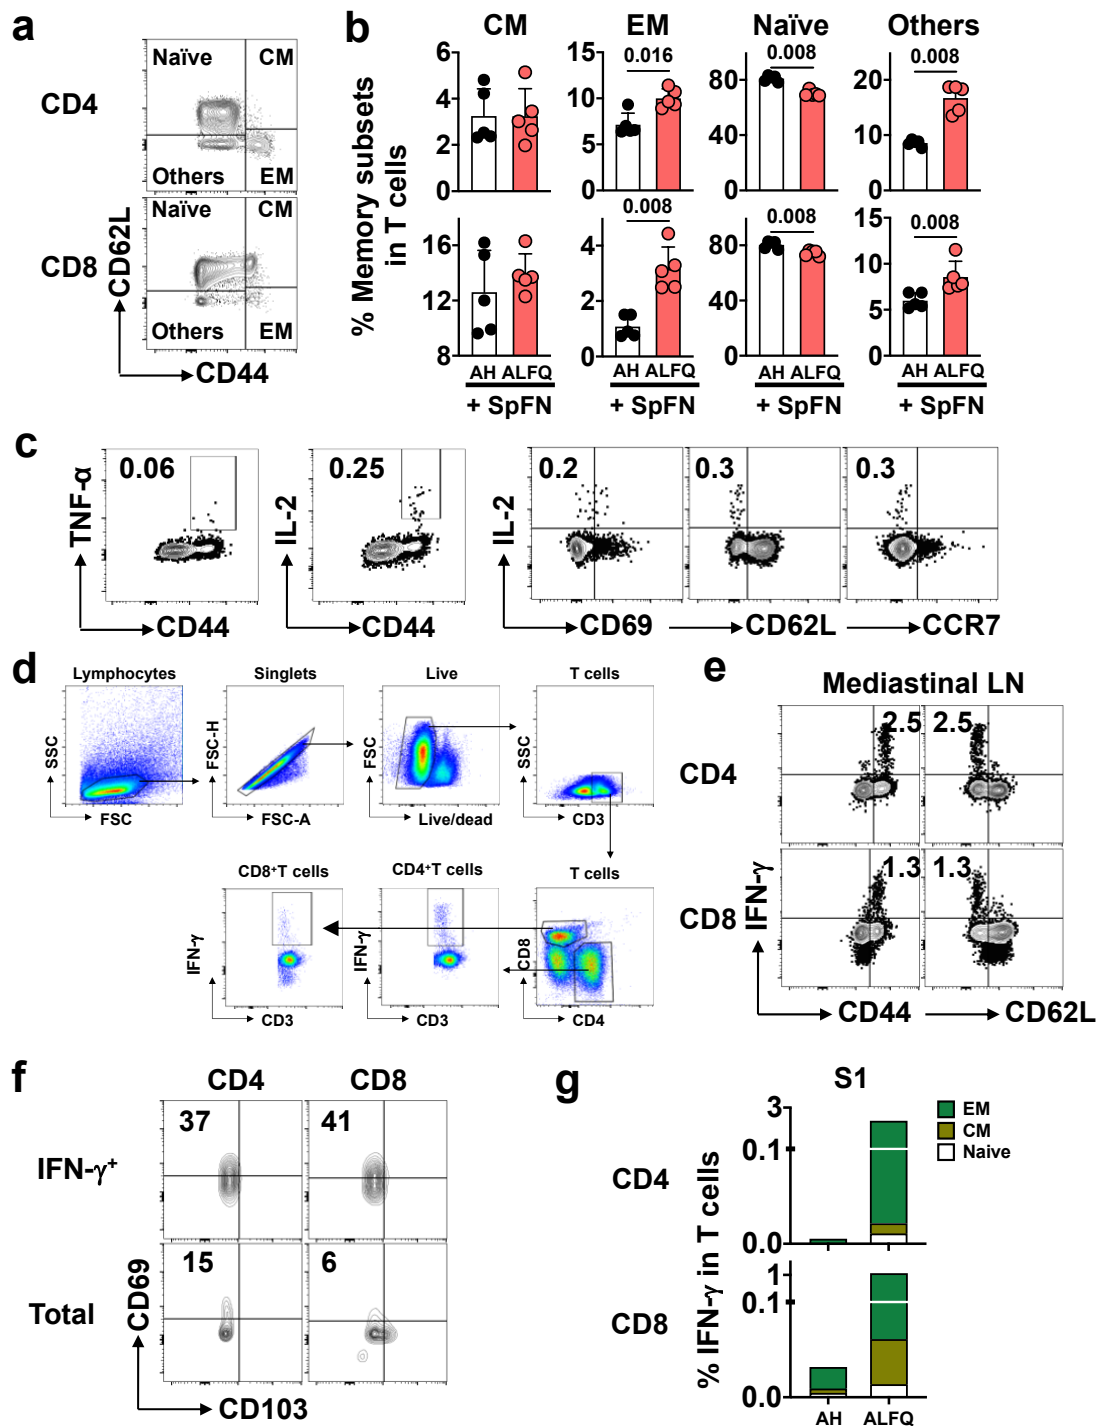

**Supplementary Fig. 2. Characterization of responding T cells in lymph nodes after SpFN vaccination.** (a) Early indication of memory potential phenotypes shown as flow plots (left panels) and quantitation of phenotype potential between the two vaccine groups at day 7 after the first vaccination (right panel) in the dLNs. (b) Memory potential was characterized as naïve (CD62L<sup>+</sup>CD44<sup>-</sup>), central memory (CD62L<sup>+</sup>CD44<sup>+</sup>), effector memory (CD62L<sup>-</sup>CD44<sup>+</sup>), and other. (c) Cytokine expression and activation markers characterizing SARS-CoV-2 spike-specific CD4<sup>+</sup> T cells at day 10 day after the first vaccination. (d) Flow cytometry gating strategy for the identification of SARS-CoV-2 spike-specific CD4<sup>+</sup> and CD8<sup>+</sup> T cells in the mediastinal LNs at week 6 post prime-boost vaccination. (e-f), Characterization of the SARS-CoV-2 spike-specific CD4<sup>+</sup> and CD8<sup>+</sup> T cells in the mediastinal LNs at week 6 following prime-boost vaccination by the expression of IFN $\gamma$ . IFN $\gamma$ <sup>+</sup>T cells are (e), CD44<sup>+</sup>CD62L<sup>-</sup> and (f) more frequently CD69<sup>+</sup> than parent populations, but CD103<sup>-</sup>, indicating activated status. (g) Memory phenotype of IFN $\gamma$ <sup>+</sup>T cells in the mediastinal LN 6 weeks post-vaccination. Bars indicate mean  $\pm$  s.d. Differences between the two groups were analyzed by using non-parametric Mann-Whitney U-test with  $P \leq 0.05$  considered as statistically significant.

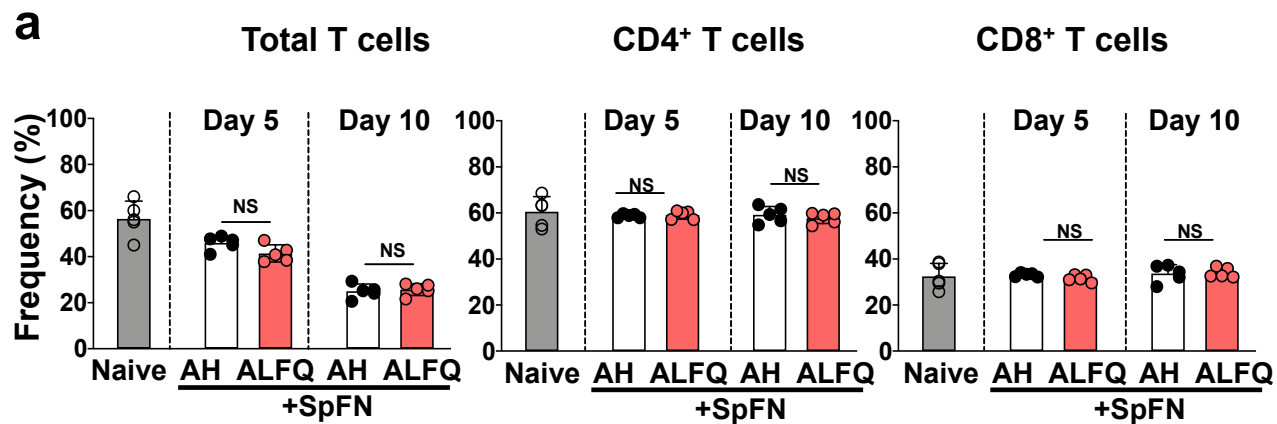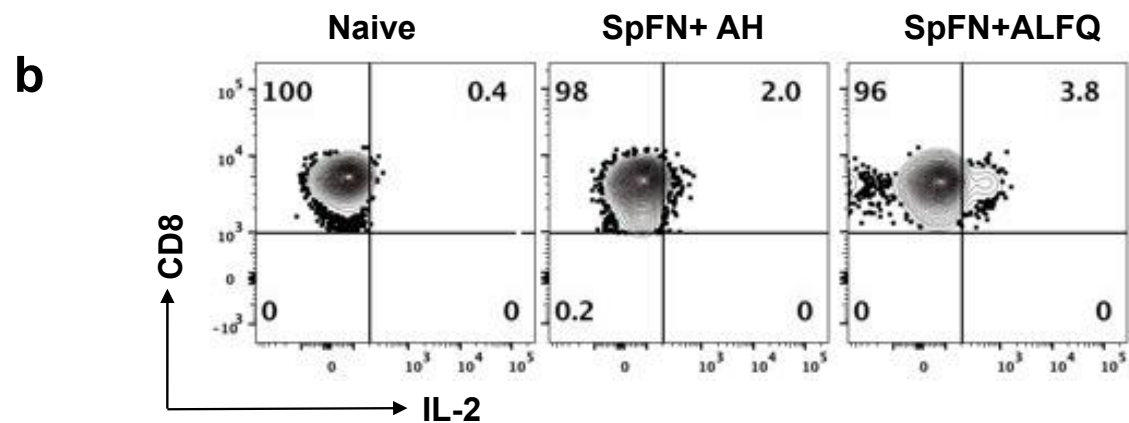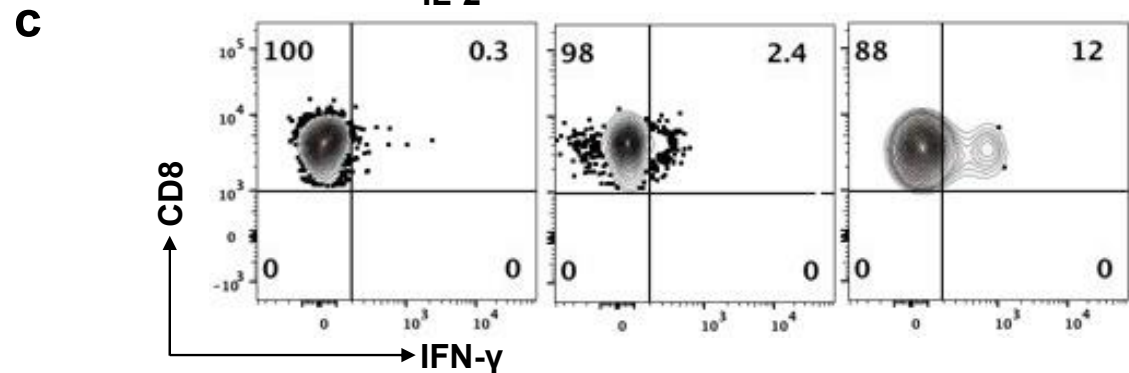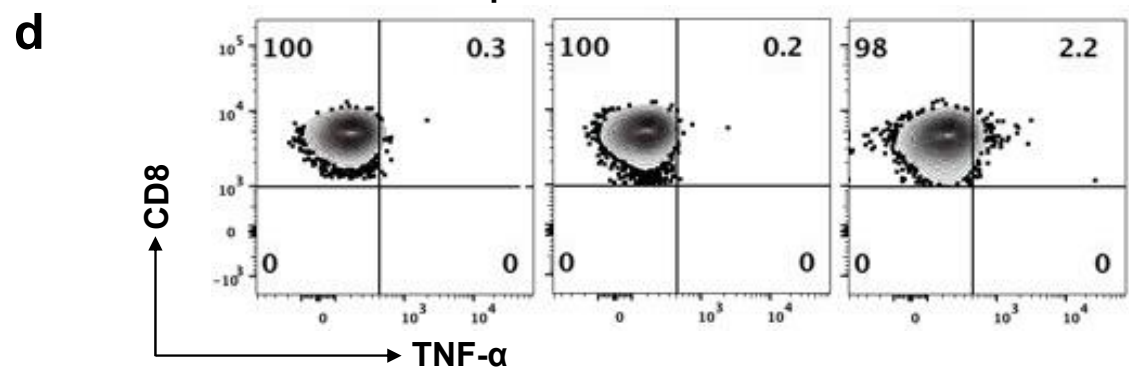

**Supplementary Fig. 3. Frequency of T cells in splenocytes of mice following priming vaccination with SpFN vaccine.**  
**(a)** Frequency of total CD3<sup>+</sup>, CD4<sup>+</sup> and CD8<sup>+</sup>T cells in splenocytes of mice on days 5 and 10 post priming vaccination with SpFN adjuvanted with AH or ALFQ. **(b-d)** Representative flow plots depicting the frequency of **(b)** IL-2 **(c)** IFN- $\gamma$  and **(d)** TNF- $\alpha$  secreting CD8<sup>+</sup> T cells on day 10 post priming vaccination. Bars indicate mean  $\pm$  s.d.

85  
86  
87  
88  
89  
90  
91

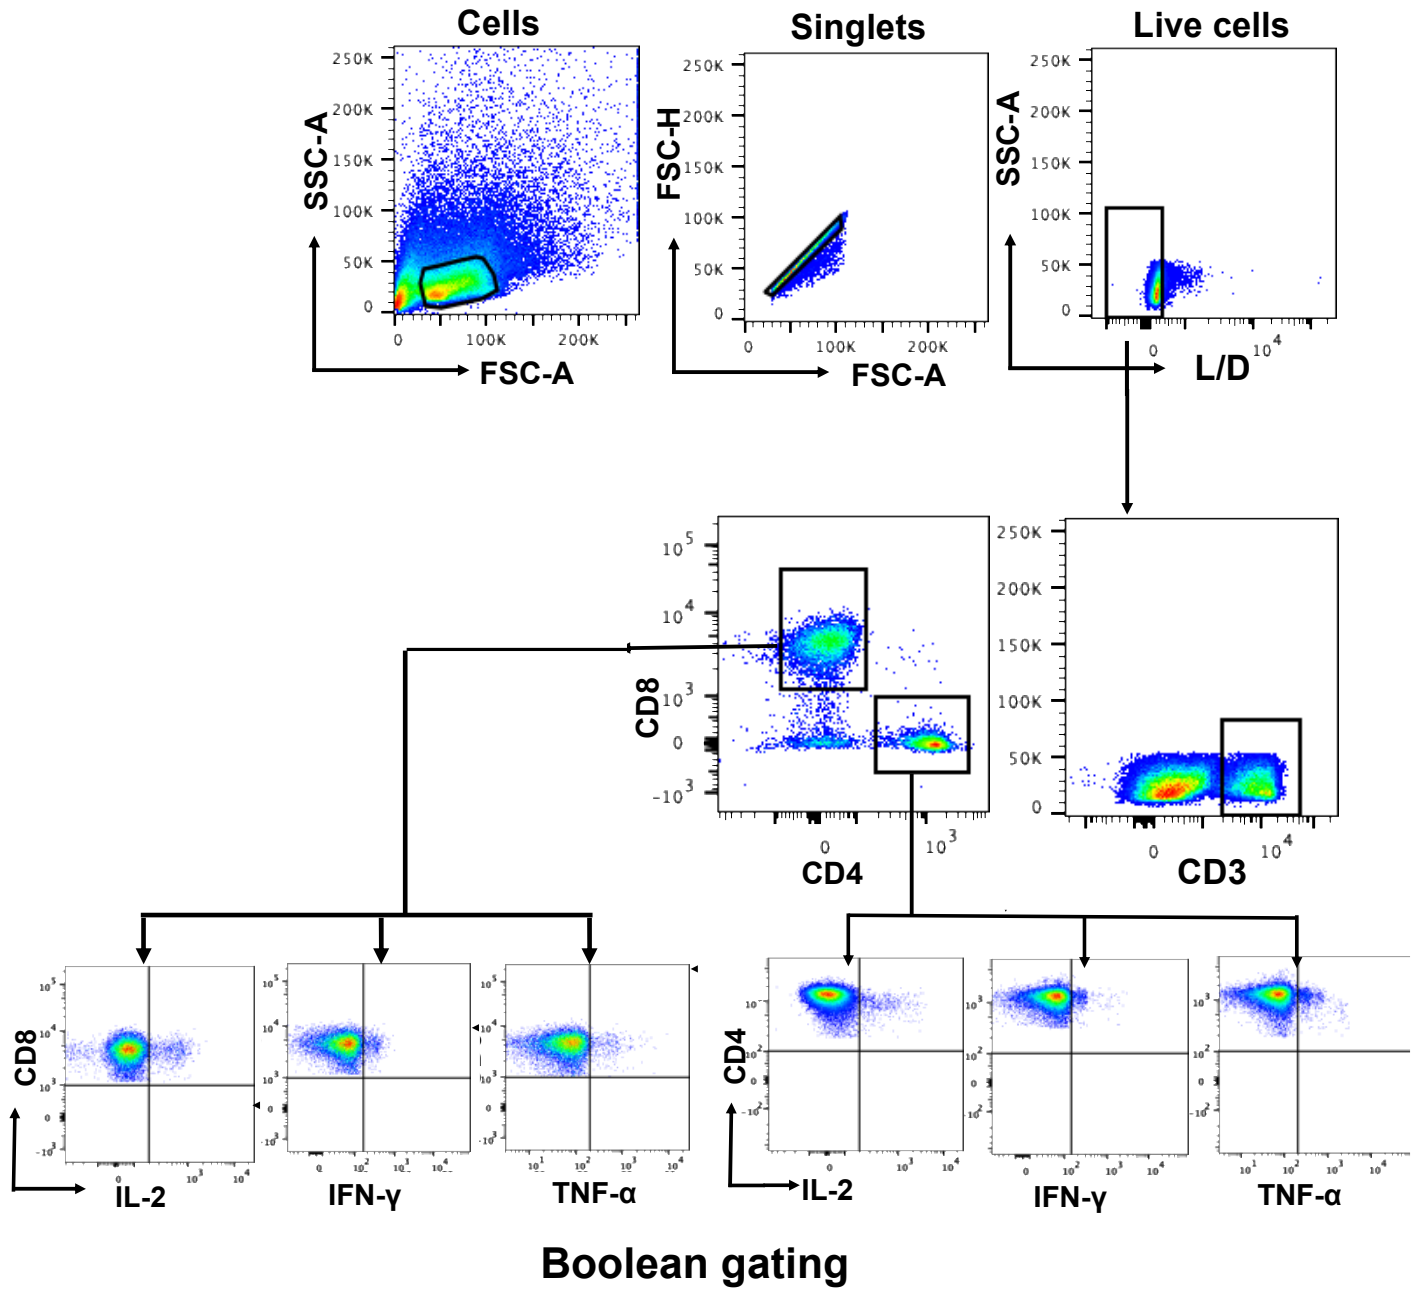

**Supplementary Fig. 4. Flow gating strategy to determine the frequency of cytokine secreting CD4<sup>+</sup> and CD8<sup>+</sup> T cells.**

Flow gating strategy to determine the frequency of cytokine secreting IL-2, IFN- $\gamma$ , and TNF- $\alpha$  secreting CD4<sup>+</sup> and CD8<sup>+</sup> T cells. Gates were defined on the respective fluorescence minus one (FMO) control. Boolean gating was performed to identify single, double, and triple positive intracellular cytokine positive cells.

92  
93  
94  
95  
96  
97

1 59  
 MFVFLVLLPLVSSQCVNLTRTQLPPAYTNSFTRGVYYPDKVFRSSVLHSTQDLFLPFF  
 60 119  
 SNVTWFHAIHVS<sup>GTNGTKRF</sup>DNPVLPFNDGVYFASTEKSNIIRGWIFGTTLD<sup>SKTQSLLI</sup>  
 120 179  
 V<sup>NNATNVVIVKVC</sup>EFQFCNDPFLGVYYHKNNKSWMESEFRVYSSANNCTFEYVS<sup>QPFLMDL</sup>  
 180 239  
<sup>EGKQ</sup>GNFKNLREFVFKNIDGYFKIYSKHTPINLVRDLPQGFSALE<sup>PLVDLPIGINI</sup>TRFQ  
 240 299  
<sup>TL</sup>LALHRSYLTPGDSSSGWTAGAAAYVGYLQ<sup>PRTFL</sup>LLKYNENGTITDAVDCALDPLSET  
 300 359  
 KCTLKSFTVEKGIYQTSNFRVQPTESI<sup>VRFPNITNLCP</sup>FGEVFNATRFASVYAWNRKRIS  
 360 419  
 NCVADYSVLVNSASFSTFKCY<sup>GVSPTKLNLDL</sup>FTNVYADSFVIRGDEVRQIAPGQTGKIA  
 420 479  
 DYN<sup>YKLPDDFTGC</sup>VIAWNSNNLDSKVGGNYNYLRLFRKSNLKPFERDISTEIQAGSTP  
 480 539  
 CNGVEGFNCYFPLQSYGFQPTNGVGY<sup>QPYRVV</sup>LSFELLHAPATVCGPKKSTNLVKN<sup>KCV</sup>  
 540 599  
<sup>NFNFNGLTGT</sup>GVLTESNKKFLPFQQFGRDIADTTDAVRDPQ<sup>LEILDITPC</sup>SGGVS<sup>VIT</sup>  
 600 659  
 PGTNTSNQVAVLYQDVNCTEVPVAIHADQLTPTWRVYSTGSNVFQTRAGCLIGAEHVNNS  
 660 719  
 YECDIPGAGICASYQTQTNSPRRARSVASQ<sup>SIIAYTMSL</sup>GAENSVAYSNNNSIAIPTNFTIS  
 720 779  
 VTTEILPVSMTKTSVDCTMYICGDSTEC SNLLLQYGSFCTQLNRALTGIAVEQDKNTQE<sup>VF</sup>  
 780 839  
 AQVKQIYKTPPIKDFGGFNFSQILPDPSKPSKRSFIEDLLFNKVTLADAGFIKQYGDCLGD  
 840 899  
 IAARDLICAQKFNGLTVLP<sup>LLTDEMIAQYTSALLAGTITSG</sup><sup>WTFGAGAAALQIPFAMQMA</sup>  
 900 959  
 YRFNGIGVTQNVLYENQKLIANQFN<sup>SAIGKIQDLSSTASALGKLQDVVNQNAQALNTLVK</sup>  
 960 1019  
 QLSSNFGAISSVLNDILSRDKVEAEVQIDRLITGRLQSLQTYVTQQLIRAAEIRASANLA  
 1020 1079  
 ATKMSECVLGQSKRVDFCGKGYHLSFPQSAPHG<sup>VVFLHVTYV</sup>PAQEKNFTTAPAICH<sup>DGK</sup>  
 1080 1139  
 AHFPREGVFVSNGTHWFVTQRNFYEPQIITDNTFVSGNCDVVIGIVNNTVYDPLQPELDS  
 1140 1199  
 FKEELDKYFKNHTSPD<sup>VDLGD</sup>ISGINASVVNIQKEIDRLNEVAKNLNESLIDLQELGKYE<sup>Q</sup>  
 1200 1259  
 YIKWPWYIWLGFIAGLIAIVMTIMLCCMTSCC<sup>SCLKGCCSCGSCCK</sup>FEDEDDSEPV<sup>LKGVKL</sup>  
 1260  
 HYT

99  
100  
101  
102  
103  
104  
105

**Supplementary Fig. 5. Amino acid sequence of the SARS-CoV-2 spike protein.**

Highlighted peptides were part of ELISpot-reactive SARS-CoV-2 glycoprotein derived matrix peptide pools. Underlined peptides are sequences predicted by NETMHC prediction algorithm (iedb.org). Numbers indicate amino acid residues.

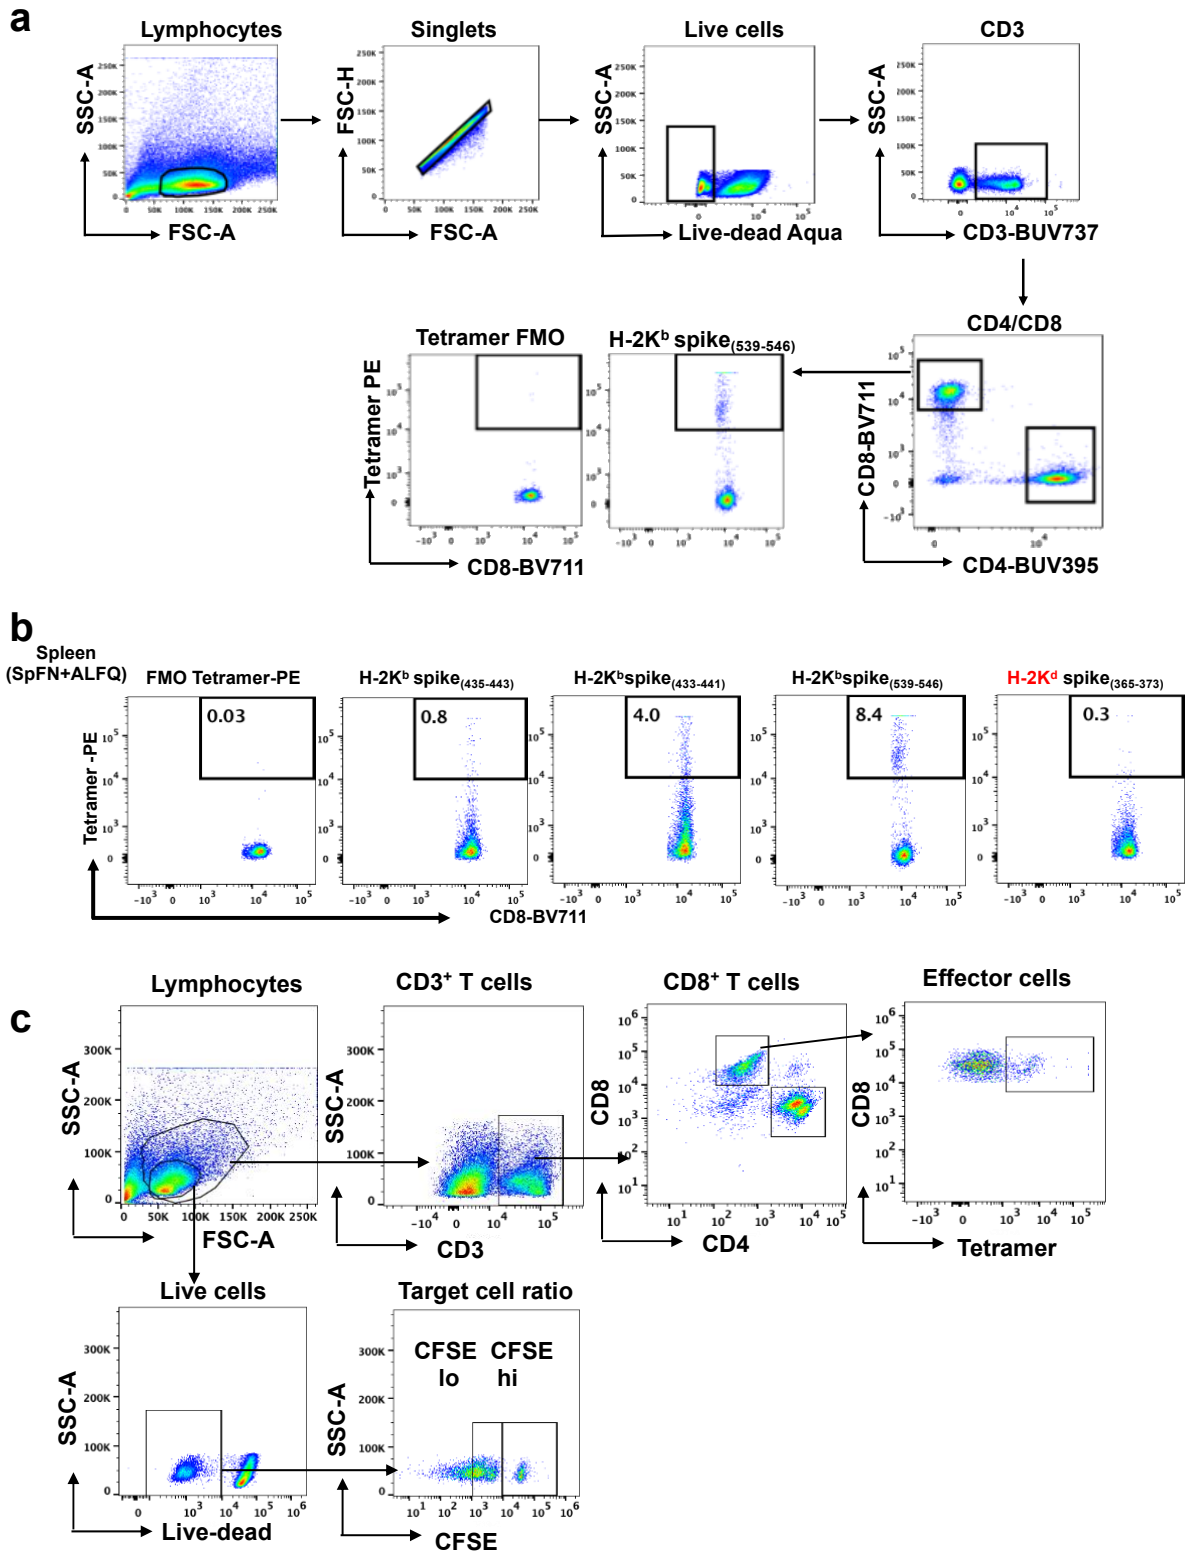

**Supplementary Fig. 6. Flow gating strategy for determining the frequency of SARS-CoV-2 specific CD8<sup>+</sup> T cells and for the CTL assay following SpFN vaccination**

(a) Flow gating strategy to determine the frequency of SARS-CoV-2 spike specific CD8<sup>+</sup> T cells in the splenocytes of SpFN vaccinated mice as detected by MHC class I tetramer staining. (b) Cells were stained for four different tetramers directed towards four different epitopes on SARS-CoV-2 spike protein [ $K^b$  (433-441); (435-443); (539-546) and  $K^d$  (365-373)]. Detailed information is provided in Supplementary Table 6. (c) Gating strategy used to determine the frequency of tetramer positive CD8<sup>+</sup> T cells (effector cells) and ratio of CFSE high (hi): low (lo) target cells in the cytotoxic T lymphocyte killing assay.



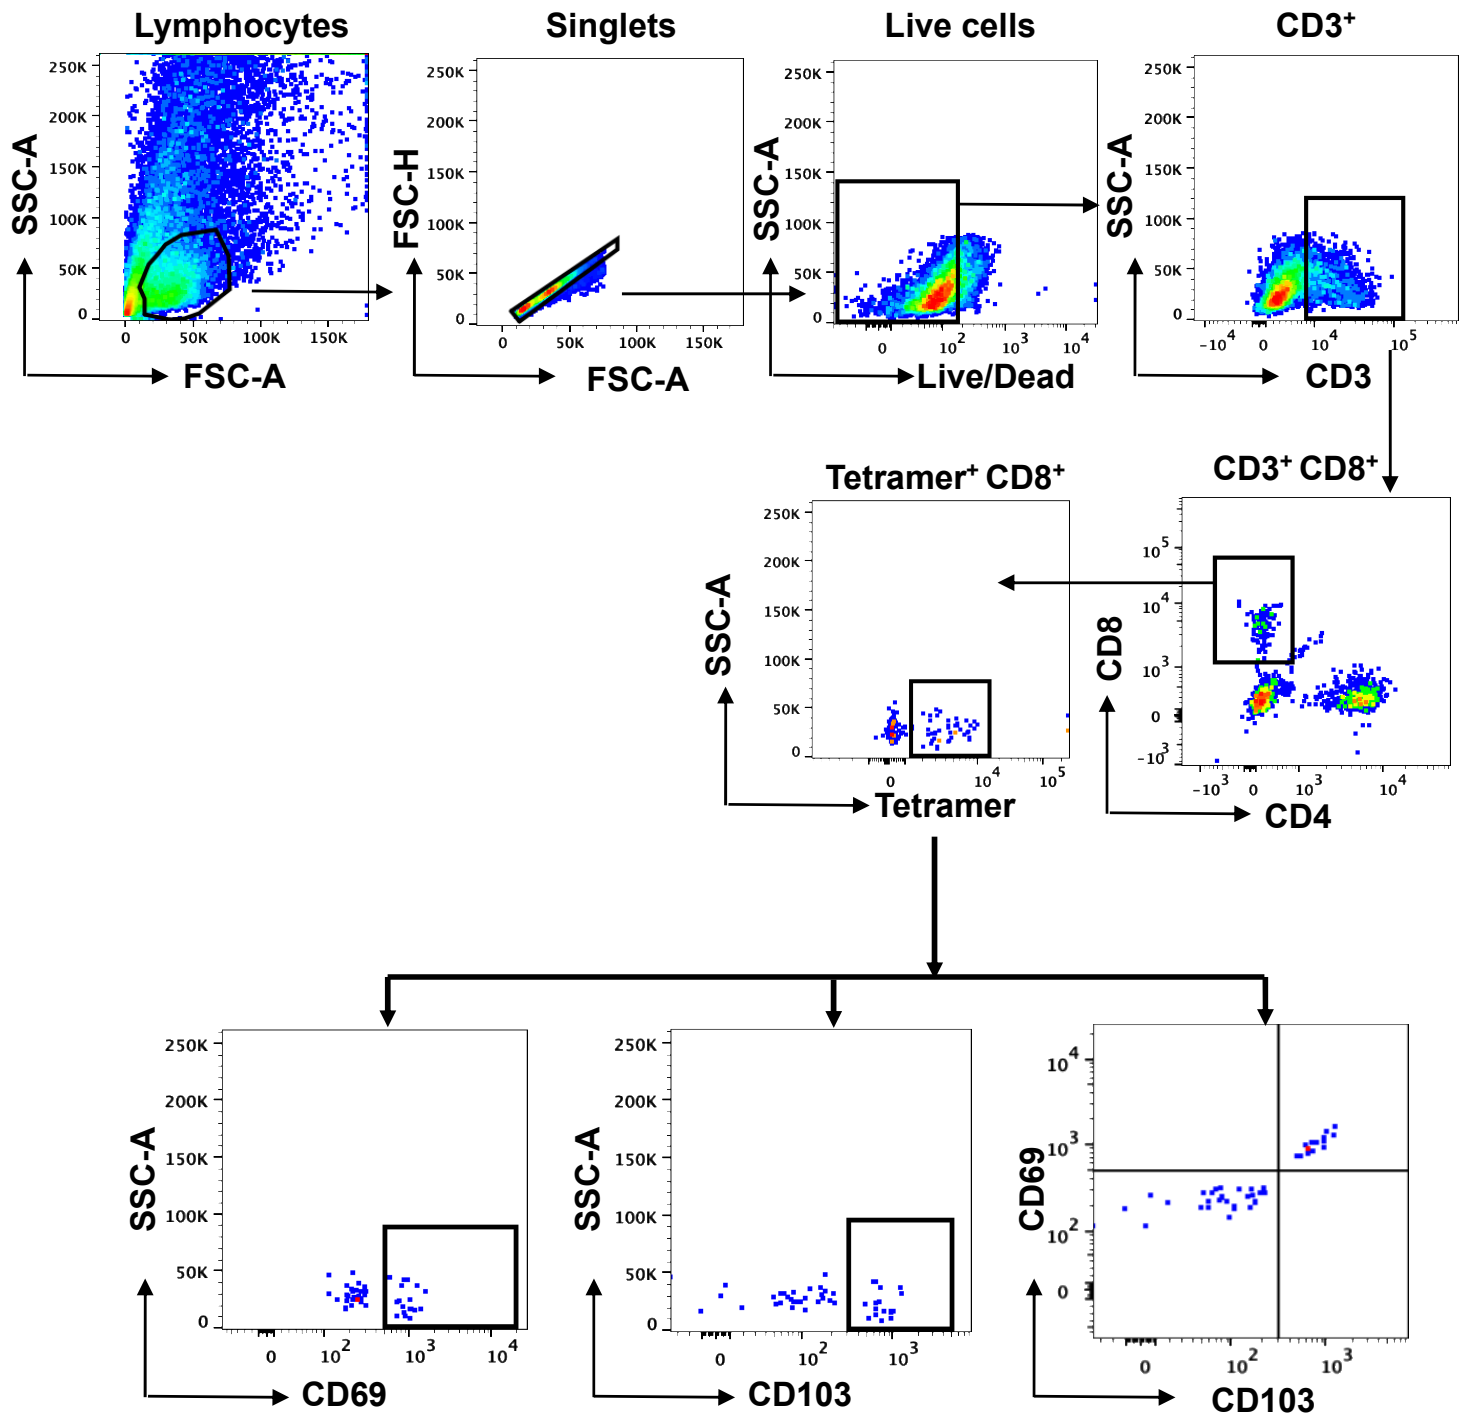

Supplementary Fig. 7. Flow gating strategy to determine the frequency of SARS-CoV-2 spike-specific CD8<sup>+</sup> T cells in perfused lungs of SpFN vaccinated mice as detected by MHC class I tetramer staining followed by CD69 and CD103 staining.

Flow gating strategy to determine the frequency of SARS-CoV-2 spike (539-546)-specific tetramer positive CD8<sup>+</sup> T cells followed by CD69 and CD103 staining in lung tissue of SpFN vaccinated mice.

128  
129  
130

**Supplementary Table 1.** List of antibodies used for Cytex flow cytometry-based analysis of the APC phenotypes

| Antigen    | Fluorochrome | Clone       | Manufacturer    | Catalog number |
|------------|--------------|-------------|-----------------|----------------|
| CD45R/B220 | BUV395       | RA3-6B2     | BD              | 563793         |
| CD80       | BUV661       | 16-10A1     | BD              | 741515         |
| CD3        | BUV737       | 145-2C11    | BD              | 612771         |
| CD86       | BUV805       | GL1         | BD              | 741946         |
| CCR7       | BV421        | 4B12        | BioLegend       | 120120         |
| CD40       | BV480        | 3/23        | BD              | 746970         |
| XCR1       | BV510        | ZET         | BioLegend       | 148218         |
| CD11c      | BV570        | N418        | BioLegend       | 117331         |
| CD169      | BV605        | 3D6.112     | BioLegend       | 142413         |
| F4/80      | BV650        | BM8         | BioLegend       | 123149         |
| I A/E      | BV711        | M5/114.15.2 | BioLegend       | 107643         |
| CD117      | BV750        | 2B8         | BD              | 747412         |
| CD44       | BV785        | IM7         | BioLegend       | 103059         |
| CXCR5      | FITC         | L138D7      | BioLegend       | 145520         |
| CD8a       | PerCP        | 53-6.7      | BioLegend       | 100732         |
| CD24       | PerCP-Cy5.5  | M1/69       | BioLegend       | 101824         |
| PDCA1      | PE           | REA818      | Miltenyi Biotec | 130-112-220    |
| CD103      | PE-Dazzle594 | 2E7         | BioLegend       | 121430         |
| CD11b      | PE-Cy5       | M1/70       | BioLegend       | 101210         |
| Siglec-F   | PE-Vio770    | REA798      | Miltenyi Biotec | 130-112-176    |
| CD64       | AF647        | X54-5/7.1   | BioLegend       | 139322         |
| Ly6G       | AF700        | 1A8         | BioLegend       | 127610         |
| NK1.1      | APC-Cy7      | PK136       | BioLegend       | 108724         |
| CD45       | APC-Fire810  | 30-F11      | BioLegend       | 103174         |

131  
132  
133  
134

**Supplementary Table 2.** List of antibodies used for Cytex flow cytometry-based analysis of the T cell phenotypes

| Antigen | Fluorochrome  | Clone    | Manufacturer | Catalog number |
|---------|---------------|----------|--------------|----------------|
| CD3     | BUV395        | 145-2C11 | BD           | 563565         |
| CD69    | BV421         | H1.2F3   | BioLegend    | 104528         |
| CD44    | BV510         | IM7      | BioLegend    | 103044         |
| CD62L   | BV570         | MEL-14   | BioLegend    | 104433         |
| PD-1    | BV605         | 29F.1A2  | BioLegend    | 135219         |
| ICOS    | BV650         | 398.4A   | BioLegend    | 313550         |
| CD8     | PerCP-Cy5.5   | 53-6.7   | BioLegend    | 100734         |
| CXCR5   | PE            | L138D7   | BioLegend    | 145504         |
| CD4     | PE-Dazzle 594 | GK1.5    | BioLegend    | 100456         |
| CCR7    | PE-Cy5        | 4B12     | BioLegend    | 120114         |
| CD45    | APC-Fire810   | 30-F11   | BioLegend    | 103174         |

135  
136  
137  
138

**Supplementary Table 3.** List of antibodies used for Cytex flow cytometry-based analysis of the T cell cytokine staining

| Antigen                                | Fluorochrome  | Clone        | Manufacturer | Catalog number |
|----------------------------------------|---------------|--------------|--------------|----------------|
| T cell surface staining                |               |              |              |                |
| CD3                                    | BUV395        | 145-2C11     | BD           | 563565         |
| CD69                                   | BV421         | H1.2F3       | BioLegend    | 104528         |
| CD44                                   | BV510         | IM7          | BioLegend    | 103044         |
| CD62L                                  | BV570         | MEL-14       | BioLegend    | 104433         |
| ICOS                                   | BV650         | 398.4A       | BioLegend    | 313550         |
| CXCR3                                  | BV711         | CXCR3-173    | BD           | 740825         |
| CD8                                    | PerCP-Cy5.5   | 53-6.7       | BioLegend    | 100734         |
| CXCR5                                  | PE            | L138D7       | BioLegend    | 145504         |
| CD4                                    | PE-Dazzle 594 | GK1.5        | BioLegend    | 100456         |
| CCR7                                   | PE-Cy5        | 4B12         | BioLegend    | 120114         |
| PD-1                                   | APC           | 29F.1A2      | BioLegend    | 135210         |
| CD45                                   | APC-Fire810   | 30-F11       | BioLegend    | 103174         |
| T cell intracellular cytokine staining |               |              |              |                |
| IFN- $\gamma$                          | BV605         | XMG1.2       | BioLegend    | 505839         |
| TNF- $\alpha$                          | BV785         | MP6-XT22     | BioLegend    | 506341         |
| IL-2                                   | FITC          | JES6-5H4     | BioLegend    | 503806         |
| GrB                                    | PE-Cy7        | QA16A02      | BioLegend    | 372214         |
| IL-17A                                 | AF700         | TC11-18H10.1 | BioLegend    | 506914         |
| IL-10                                  | APC-Cy7       | JES5-16E3    | BioLegend    | 505036         |

139  
140

141 **Supplementary Table 4.** List of antibodies used for intracellular cytokine staining by BD LSRII flow  
 142 cytometry-based analysis of the cytokine response in the splenocytes  
 143

| Antigen       | Fluorochrome | Clone    | Manufacturer | Catalog number |
|---------------|--------------|----------|--------------|----------------|
| CD3           | BUV737       | 145-2C11 | BD           | 612771         |
| CD4           | BUV395       | GK1.5    | BD           | 565974         |
| CD8a          | BV711        | 53-6.7   | BD           | 563046         |
| IFN- $\gamma$ | V450         | XMG1.2   | BD           | 560661         |
| IL-4          | PerCP-Cy5    | 11B11    | BD           | 560700         |
| TNF- $\alpha$ | FITC         | MP6-XT22 | BD           | 554418         |
| IL-2          | APC          | JES6-5H4 | Biologend    | 503810         |
| IL-2          | PE           | JES6-5H4 | Biologend    | 503808         |

144 **Supplementary Table 5.** List of antibodies used for staining perfused lung cells and analysis by BD LSRII  
 145 flow cytometry  
 146  
 147

| Antigen | Fluorochrome | Clone    | Manufacturer | Catalog number |
|---------|--------------|----------|--------------|----------------|
| CD3     | BUV737       | 145-2C11 | BD           | 612771         |
| CD4     | BUV395       | GK1.5    | BD           | 565974         |
| CD8a    | BV711        | 53-6.7   | BD           | 563046         |
| CD69    | BV650        | H1.2F3   | BD           | 740460         |
| CD103   | BV510        | 2E7      | BD           | 748258         |

148 **Supplementary Table 6.** List of MHC class I tetramer used for the detection of SARS-CoV-2 spike specific  
 149 CD8<sup>+</sup> T cell response  
 150  
 151

| Allele            | Description <sup>1</sup>       | Peptide sequence | Fluorochrome        | Concentration |
|-------------------|--------------------------------|------------------|---------------------|---------------|
| H-2K <sup>d</sup> | SARS-CoV-2-spike aa<br>365-373 | CYGVSPTKL        | PE-labeled tetramer | 1.1 mg/mL     |
| H-2K <sup>b</sup> | SARS-CoV-2-spike aa<br>433-441 | GNYNYLYRL        | PE-labeled tetramer | 1.3 mg/mL     |
| H-2K <sup>b</sup> | SARS-CoV-2-spike aa<br>539-546 | VNFNFNGL         | PE-labeled tetramer | 1.2 mg/mL     |
| H-2K <sup>b</sup> | SARS-CoV-2-spike aa<br>435-443 | YNYLYRLF         | PE-labeled tetramer | 1.3 mg/mL     |

152 <sup>1</sup>The tetramers were obtained from NIH Tetramer Core Facility at Emory University, Atlanta, GA.  
 153  
 154
